# Supplementary material for: Porous cobalt–iron nitride nanowires as excellent bifunctional electrocatalysts for overall water splitting
Source: Royal Society of Chemistry journal article supplement (doi:10.1039/c6cc06608a), 2016-01-01
Supplement: c6cc06608a1.pdf [file c6cc06608a1.pdf]

## Supporting Information

### Porous Cobalt-Iron Nitride Nanowires as Excellent Bifunctional Electrocatalyst for Overall Water Splitting

Yanyong Wang, Dongdong Liu, Zhijuan Liu, Chao Xie, Jia Huo, and Shuangyin Wang\*

State Key laboratory of Chem/Bio-sensing and Chemometrics, College of Chemistry and Chemical Engineering, Hunan University, Changsha, 410082, China.

## Experimental details

**Synthesis of Co<sub>3</sub>Fe Double Hydroxide (Co<sub>3</sub>Fe DH) Nanowires on Nickel Foam (NF).** The Co<sub>3</sub>Fe DH/NF precursor (denoted as Co<sub>3</sub>Fe DH in all Figures) was synthesized by a hydrothermal reaction. In a typical experiment, nickel foam was cleaned carefully with HCl and washed with deionized water, acetone, and ethanol for several times. 5 mM iron nitrate (Fe(NO<sub>3</sub>)<sub>3</sub>·9H<sub>2</sub>O), 15 mM cobalt nitrate (Co(NO<sub>3</sub>)<sub>2</sub>·6H<sub>2</sub>O) and 9.375 mM triethanolamine (TEA) were dissolved in 200 ml deionized water. Next, 7.0 mmol of urea were added to the solution and magnetically stirred for 1 h, and then a cleaned NF (3 cm × 4 cm) was immersed into the above solution for another 30 min. The solution (60 ml) and NF were transferred to a stainless-steel Teflon-lined autoclave (100 ml). After being kept in a preheated oven at 150 °C for 48 hours, the autoclave was cooled down naturally to room temperature. The Co<sub>3</sub>Fe DH/NF precursor was washed with water and ethanol for three times and drying at 60 °C for 10 h, the Co<sub>3</sub>Fe DH/NF nanowires precursor was obtained. Similarly, the CoFe DH/NF nanowires, Co<sub>2</sub>Fe DH/NF nanowires and Co<sub>4</sub>Fe DH/NF nanowires also were synthesized by the above hydrothermal reaction.

**Synthesis of Co<sub>3</sub>FeN<sub>x</sub>/NF.** In a typical experiment, a piece of Co<sub>3</sub>Fe DH/NF was placed in a tube furnace. The furnace was heated to 300 °C, 350 °C, 400 °C respectively at 5 °C min<sup>-1</sup> under a constant flowing NH<sub>3</sub> atmosphere (100 ml/min) and maintained for 180 min, and then cooling down naturally room temperature (denoted as Co<sub>3</sub>Fe DH-NH<sub>3</sub>-300 °C, Co<sub>3</sub>FeN<sub>x</sub> and Co<sub>3</sub>Fe DH-NH<sub>3</sub>-400 °C in all Figures, respectively). Similarly, The CoFe DH/NF nanowires, Co<sub>2</sub>Fe DH/NF nanowires and Co<sub>4</sub>Fe DH/NF nanowires were placed in a tube furnace which were heated 350 °C at 5 °C min<sup>-1</sup> under a constant flowing NH<sub>3</sub> atmosphere (100 ml/min) and maintained for 180 min, and then cooling down naturally room temperature.

**Synthesis of control samples.** In a typical experiment, a piece of Co<sub>3</sub>Fe DH/NF was placed in a tube furnace. The furnace was heated to 450 °C at 5 °C min<sup>-1</sup> under a constant flowing Ar atmosphere (100 ml/min) and maintained for 180 min, and then cooling down naturally room temperature (denoted as Co<sub>3</sub>Fe DH-Ar in all Figures). A piece of NF was placed in a tube furnace, which was heated to 350 °C at 5 °C min<sup>-1</sup> under a constant flowing NH<sub>3</sub> atmosphere (100 ml/min)

and maintained for 180 min, and then cooling down naturally room temperature.(denoted as NF-NH<sub>3</sub> in all Figures)

**Electrochemical Measurements.** All of the electrochemical measurements were performed with a CHI 760D electrochemical workstation. OER and HER were performed in a three-electrode configuration and overall water splitting was performed in a two-electrode system. For electrochemical measures of OER and HER, the catalyst grown on nickel foam was used as the working electrode, saturate calomel electrode (SCE) which was constructed to a double-junction electrode to minimize contact between KOH and KCl and was used as the reference electrode in 1 M KOH electrolyte, and carbon rod was used as the counter electrode. The scan rate for linear sweep voltammetry (LSV) was kept at 2 mV/s to minimize the capacitive current. In addition, the LSV polarization curves for OER and HER was measured in saturating the solution with O<sub>2</sub> and H<sub>2</sub>, respectively. In the two-electrode system for overall water splitting, the catalyst grown on nickel foam acted as the positive electrode for OER and the other catalyst grown on nickel foam acted as the negative electrode for HER. The scan rate for linear sweep voltammetry (LSV) was kept at 2 mV/s respectively. Before recording the catalytic activity, catalysts were activated by a chronopotentiometry scan with constant current density until reaching a stable state (see nature Communications, 2016, 7. Doi:10.1038/ncomms12324). All the polarization curves in this work were corrected by eliminating iR drop with respect to the ohmic resistance of the solution. Calibration of SCE reference electrodes was done by measuring the reversible hydrogen electrode (RHE) potential using a Pt electrode under a H<sub>2</sub> atmosphere. Amperometric i-t curve and span life measurements were performed to evaluate the long-term stability. The impedance spectra of OER and HER were measured in the three-electrode system under 1.48 V versus RHE and -0.15 V versus RHE in 1 M KOH, respectively. The Faradaic efficiency ( $\mathcal{E}$ ) was calculated (see J. Am. Chem., 2014, 136 (39), 13925-13931) as follows:

$$\mathcal{E}=I_r/(I_dN)$$

Where  $I_d$  denotes the disk current,  $I_r$  denotes the ring current, and  $N$  denotes the current collection efficiency of the RRDE, which was determined using the same configuration with an IrO<sub>2</sub> thin-film electrode to be 0.21. To property calculate the Faradaic efficiency of the system, the disk electrode was held at a relatively small constant current of 200  $\mu$ A; this current is sufficiently large to ensure an appreciable O<sub>2</sub> production and sufficiently small to minimized local saturation and bubble formation at the disk electrode.

**Characterization.** The morphology of all electrocatalysts was investigated by scanning electron microscope (SEM, Hitachi, S-4800) and transmission electron microscope (TEM, FEI Tecnai G20). The crystal structures of the samples were characterized using powder X-ray diffraction (XRD, Bruker D8 Advance diffractometer, Cu K  $\alpha$  1). The X-ray photoelectron spectroscopy (XPS) analysis was performed on an ESCALAB 250Xi X-ray photoelectron spectrometer using Mg as the excitation source. The nitrogen adsorption-desorption isotherms were measured at 77 K with a Quantachrom NOVA 1000e system. Conductivity (RTS-4, 4 probes tech). The element content was tested by ICP-OES (Optima 5300).

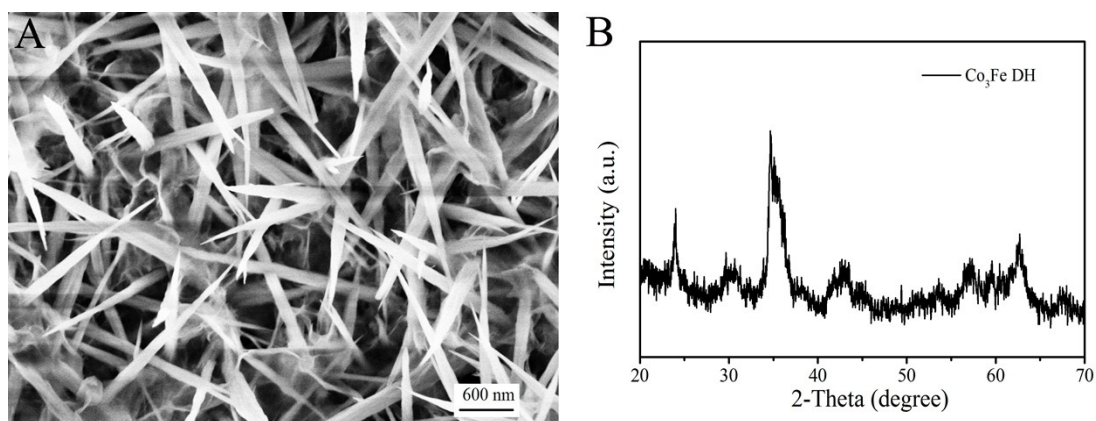

Figure S1. A) The SEM images of Co<sub>3</sub>Fe DH/NF. B) The XRD patterns of Co<sub>3</sub>Fe DH.

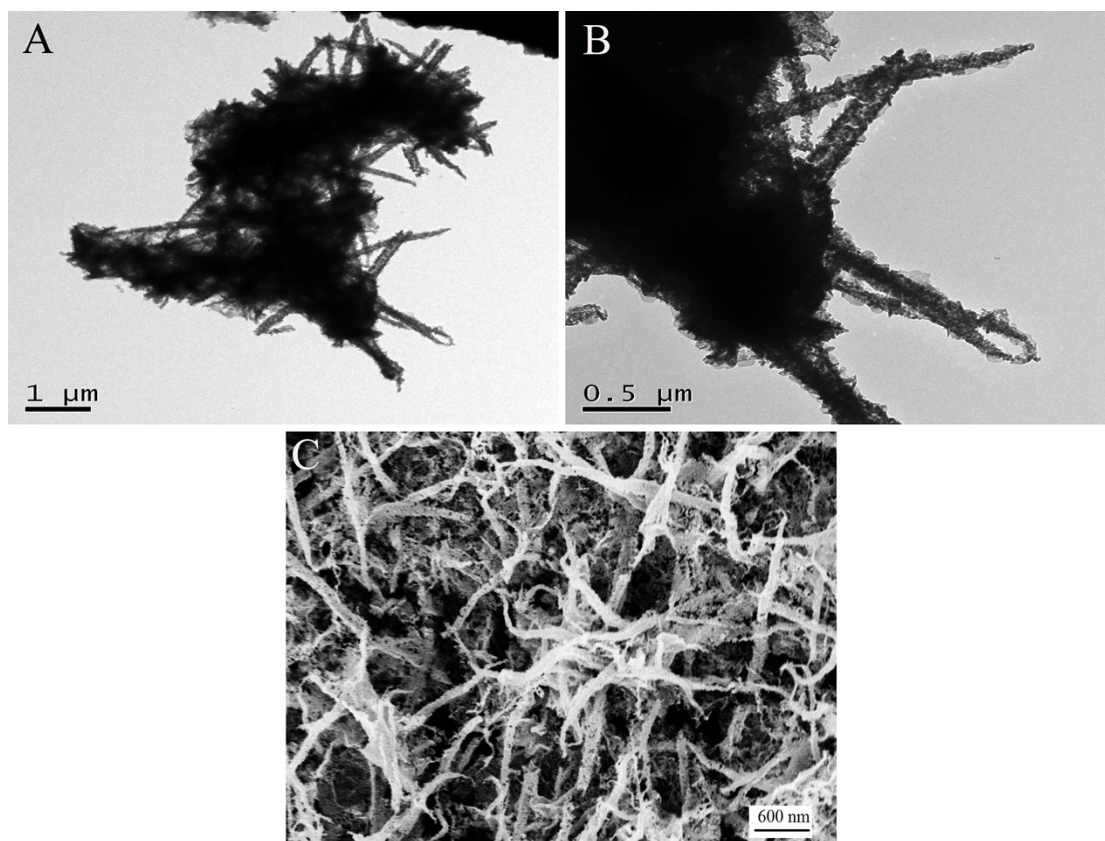

Figure S2. A) and B) The TEM images of  $\text{Co}_3\text{FeN}_x/\text{NF}$ . C) The SEM images of  $\text{Co}_3\text{FeN}_x/\text{NF}$ .

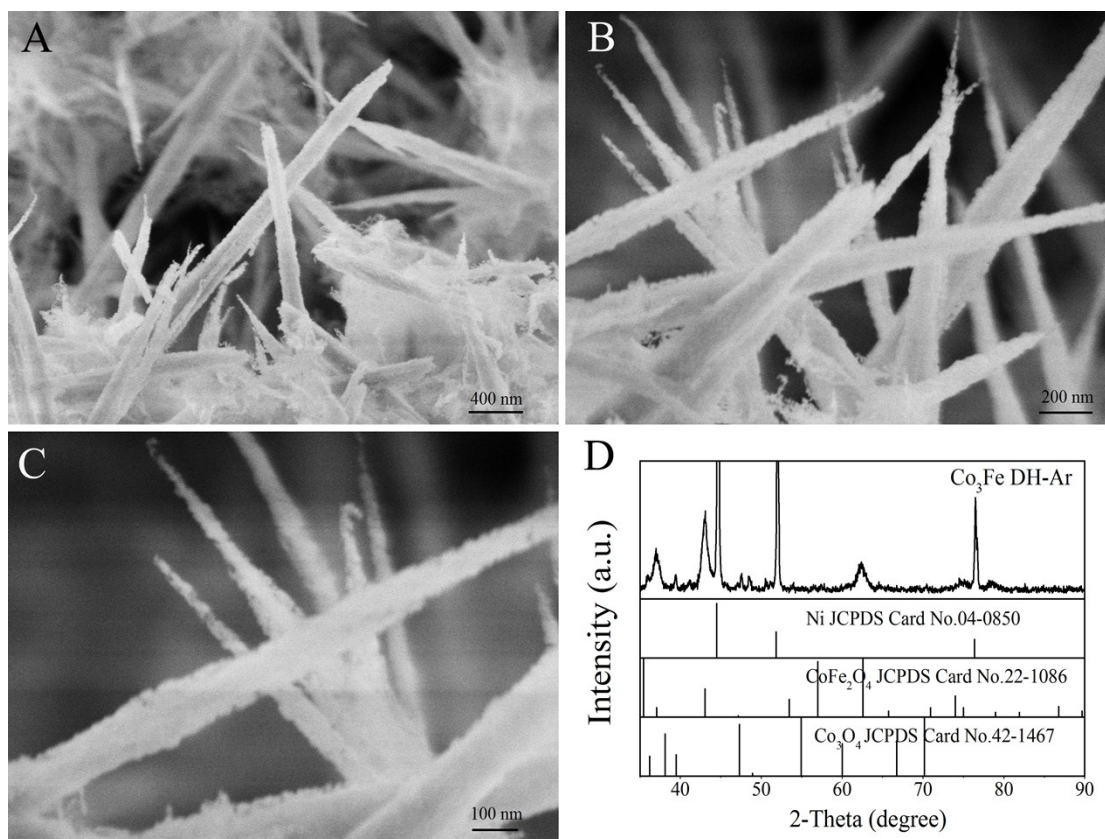

Figure S3. A), B) and C) The SEM images of  $\text{Co}_3\text{Fe}$  DH-Ar. D) The XRD patterns of  $\text{Co}_3\text{Fe}$  DH-Ar.

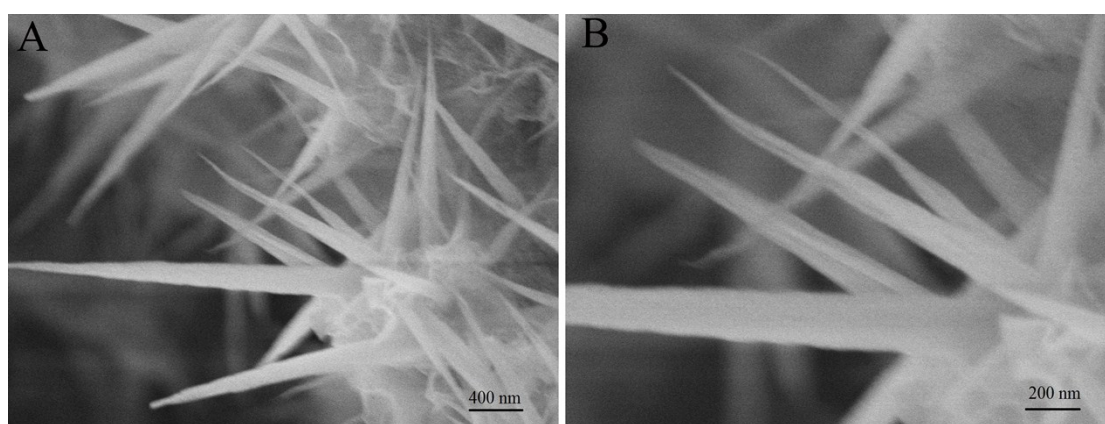

Figure S4. A) and B) The SEM images of  $\text{Co}_3\text{Fe}$  DH- $\text{NH}_3$ -300 °C.

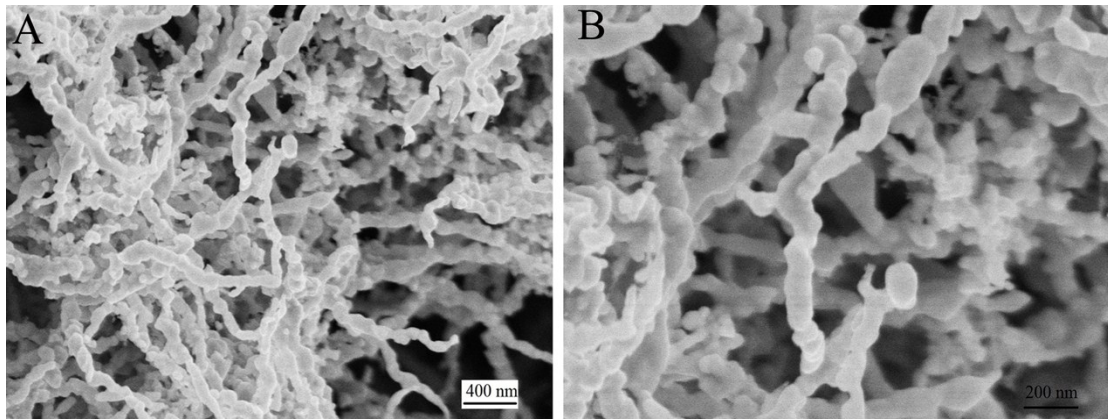

Figure S5. A) and B) The SEM images of  $\text{Co}_3\text{Fe DH-NH}_3\text{-400 } ^\circ\text{C}$ .

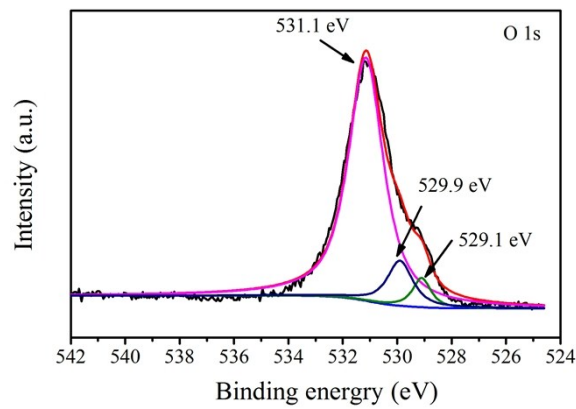

Figure S6. The O1s XPS spectrum of  $\text{Co}_3\text{FeN}_x$ . The O 1s spectrum was split into three peaks, the main peak at about 531.1 eV is ascribed to the dissociative adsorbed  $\text{O}_2$  (see Tao H B, Fang L, Chen J, et al. Identification of Surface Reactivity Descriptor for Transition Metal Oxides in Oxygen Evolution Reaction[J]. Journal of the American Chemical Society, 2016.) and the weak peaks at 529.1 eV and 529.9 eV are ascribed to the Co-O band and Fe-O band, respectively, which can be considered to the surface oxide or oxygen doping.

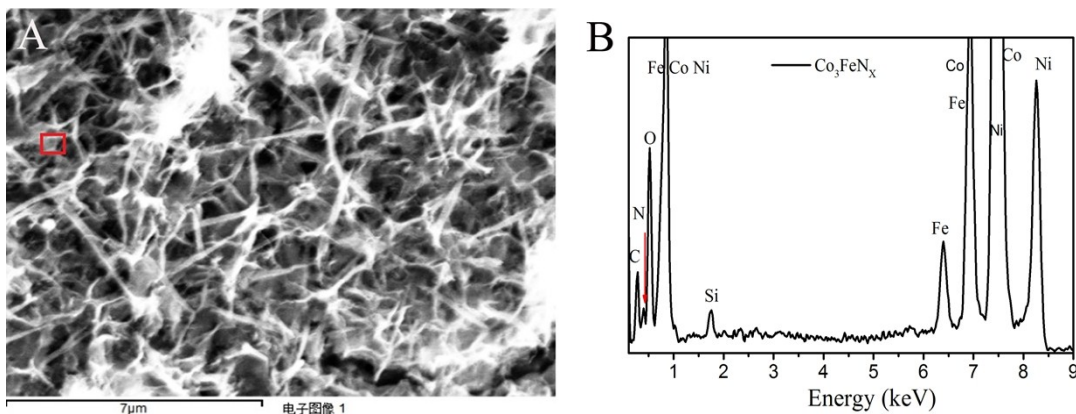

Figure S7. A) and B) The SEM and EDX images of  $\text{Co}_3\text{FeN}_x$ .

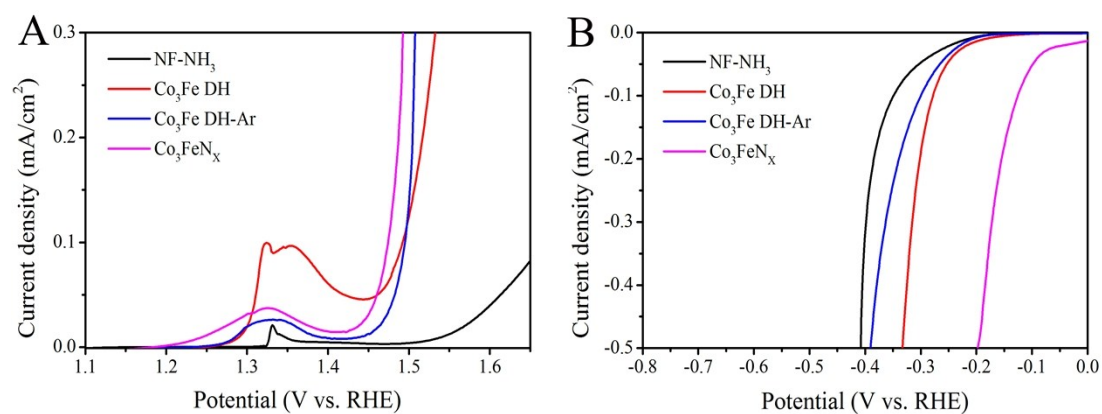

Figure S8. A) and B) The normalized current of nickel foam BET for OER and HER, respectively.

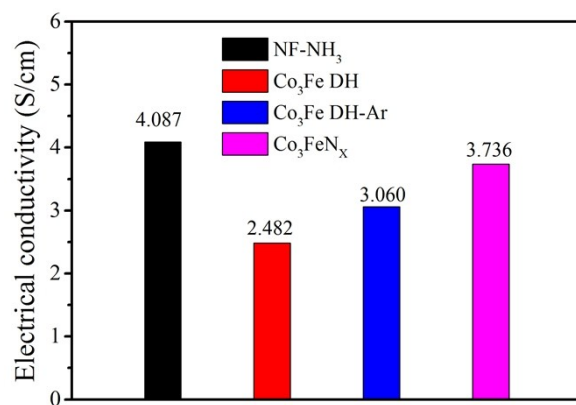

Figure S9. Electrical conductivity of the NF-NH<sub>3</sub>, Co<sub>3</sub>Fe DH, Co<sub>3</sub>Fe DH-Ar, and Co<sub>3</sub>FeN<sub>x</sub>.

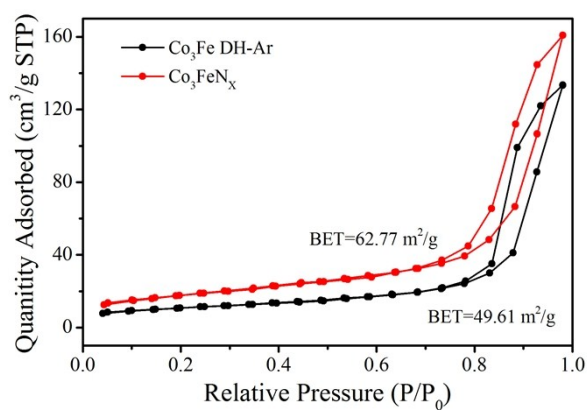

Figure S10. Nitrogen adsorption-desorption isotherms of Co<sub>3</sub>Fe DH-Ar and Co<sub>3</sub>FeN<sub>x</sub>.

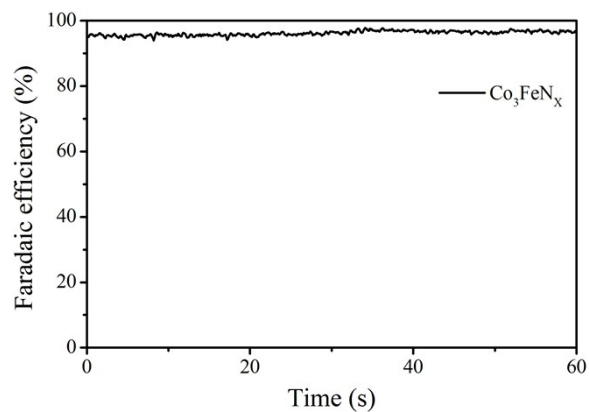

Figure S11. The Faradaic efficiency curve of  $\text{Co}_3\text{FeN}_x$  for OER.

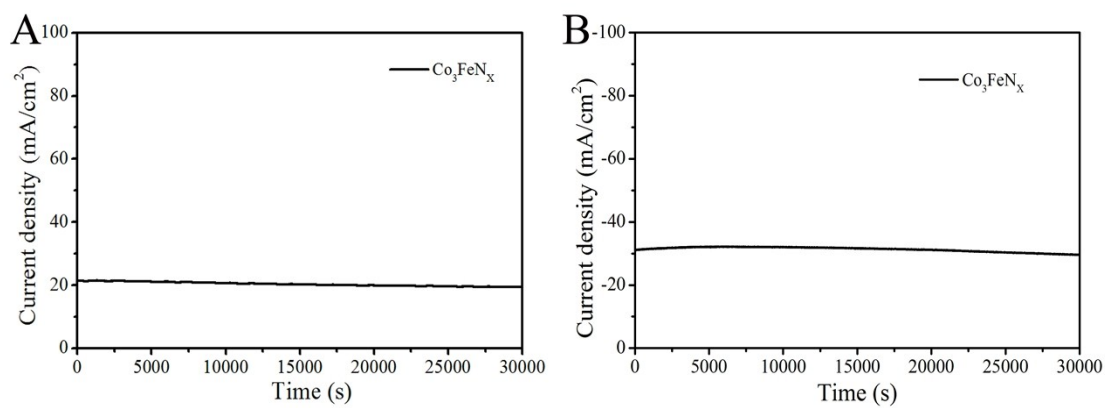

Figure S12. A) Amperometric *i-t* curve of  $\text{Co}_3\text{FeN}_x$  for OER at current density of about 20  $\text{mA}/\text{cm}^2$ . B) Amperometric *i-t* curve of  $\text{Co}_3\text{FeN}_x$  for HER at current density of about 30  $\text{mA}/\text{cm}^2$ .

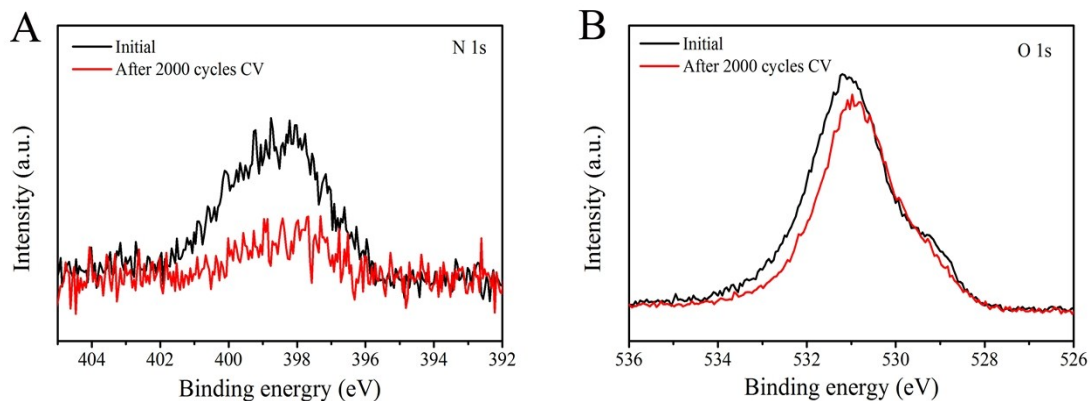

Figure S13. XPS spectra of the  $\text{Co}_3\text{FeN}_x$  and after 2000 cycles CV. A) N 1s, B) O 1s. The XPS result of N 1s shows that N 1s peak after 2000 cycles CV become weak and almost disappeared compared to initial  $\text{Co}_3\text{FeN}_x$  while O 1s peak after 2000 cycles CV has a shift towards lower binding energy, suggesting that the dissociative adsorbed  $\text{O}_2$  content reduced and the Fe/Co-O content increased. Therefore, we hold that the surface of  $\text{Co}_3\text{FeN}_x$  was partially oxidized after 2000 cycles CV. The OER catalytic mechanism for Co-based catalysts (ref. S1) in alkaline solution have been investigated and can be depicted as follows:

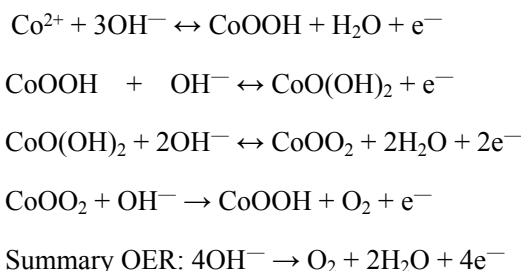

In our work, we hold that the catalytic mechanism of  $\text{Co}_3\text{FeN}_x/\text{NF}$  is similar to that of the mechanism proposed above for Co-based catalysts during the OER process in an alkaline medium. Firstly, the  $\text{Co}_3\text{FeN}_x/\text{NF}$  surface was partially oxidized to  $\text{CoOOH}/\text{Co}_3\text{FeN}_x/\text{NF}$  as the surface active sites. Secondly, with increasing of potential,  $\text{CoOOH}/\text{Co}_3\text{FeN}_x/\text{NF}$  can be oxidized to  $\text{CoOO}_2/\text{Co}_3\text{FeN}_x/\text{NF}$  in 1 M KOH. Finally,  $\text{CoOO}_2/\text{Co}_3\text{FeN}_x/\text{NF}$  is further oxidized which will lead to  $\text{O}_2$  and  $\text{CoOOH}/\text{Co}_3\text{FeN}_x/\text{NF}$  generation.

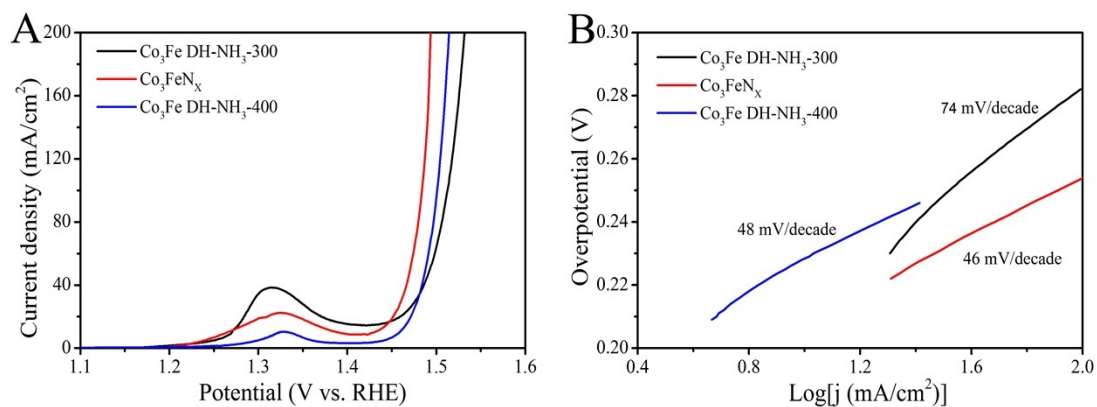

Figure S14. A) LSV curves for OER, B) Tafel plots of the Co<sub>3</sub>Fe DHs-NH<sub>3</sub>-300 °C (black curve), Co<sub>3</sub>FeN<sub>x</sub> (red curve), and the Co<sub>3</sub>Fe DHs-NH<sub>3</sub>-400 °C (blue curve).

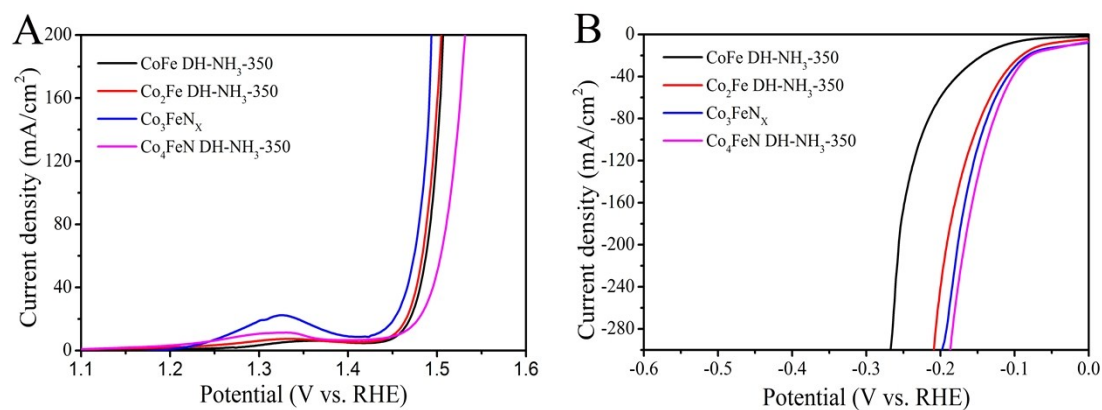

Figure S15. A) The LSV curves for OER and B) HER of the Co/Fe composition ratio from 1:1, 2:1, 3:1 to 4:1 in the precursors by NH<sub>3</sub> treatment at 350 °C.

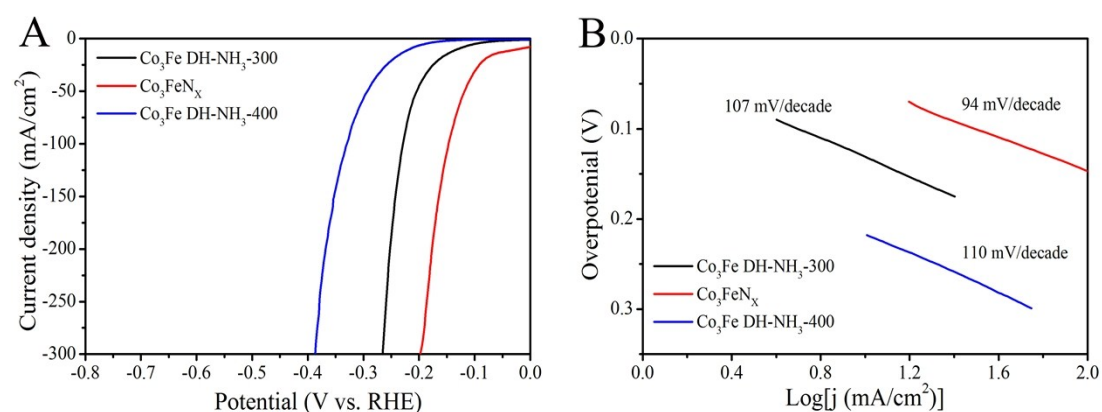

Figure S16. A) LSV curves for OER, B) Tafel plots of the Co<sub>3</sub>Fe DHs-NH<sub>3</sub>-300 °C (black curve), Co<sub>3</sub>FeN<sub>x</sub> (red curve), and the Co<sub>3</sub>Fe DHs-NH<sub>3</sub>-400 °C (blue curve).

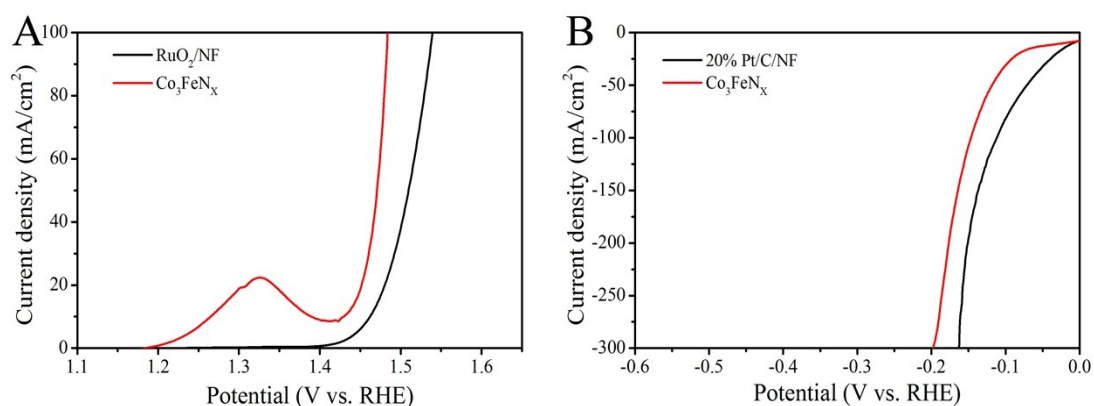

Figure S17. A) The LSV curves for OER of RuO<sub>2</sub> and Co<sub>3</sub>FeN<sub>x</sub>, B) The LSV curves for HER of 20% Pt/C, and Co<sub>3</sub>FeN<sub>x</sub>.

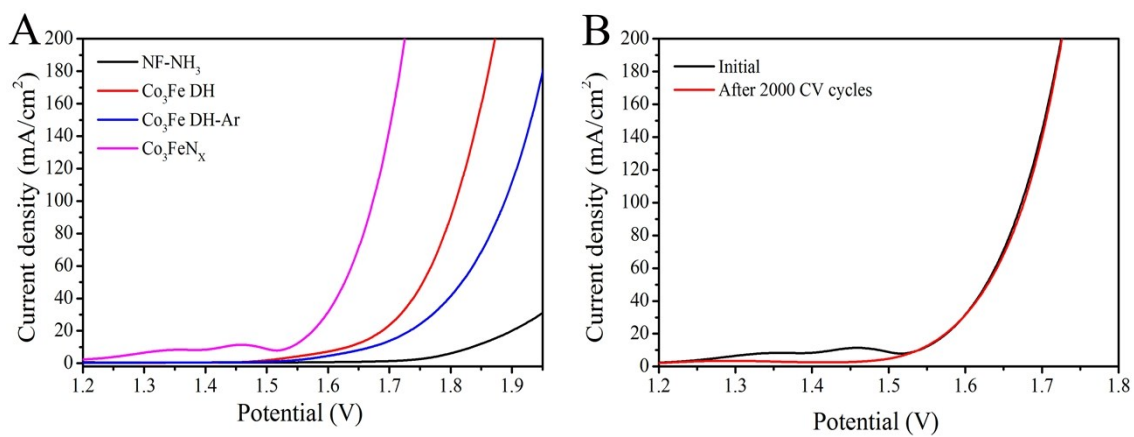

Figure S18. A) LSV curves and B) Stability test of overall water splitting for NSP-Co<sub>3</sub>FeN<sub>x</sub> in a two-electrode system with a scan rate of 2 mV/s.

Table S1. The weight percentage and atomic ratio of NSP-Co<sub>3</sub>FeN<sub>x</sub>.

| NSP-Co <sub>3</sub> FeN <sub>x</sub> | Weight percentage (%) | The atomic ratio |
|--------------------------------------|-----------------------|------------------|
| Co                                   | 54.64                 | 3                |
| Fe                                   | 17.25                 | 1                |

Table S2. Comparison of OER activity of the NSP-Co<sub>3</sub>FeN<sub>x</sub>/NF with recently reported catalyst.

| Electrocatalyst                          | Electrolyte solution | Current density (mA/cm <sup>2</sup> ) | Overpotential at the corresponding Current density (mV) | Tafel slope | Reference |
|------------------------------------------|----------------------|---------------------------------------|---------------------------------------------------------|-------------|-----------|
| NSP-Co <sub>3</sub> FeN <sub>x</sub> /NF | 1 M KOH              | 20                                    | 222                                                     | 46          | This work |
|                                          |                      | 50                                    | 241                                                     |             |           |
|                                          |                      | 100                                   | 254                                                     |             |           |
| SOA-Co <sub>4</sub> N NW/CC              | 1 M KOH              | 10                                    | 257                                                     | 44          | Ref. S1   |
| Co <sub>3</sub> O <sub>4</sub> NW/CC     | 1 M KOH              | 10                                    | 320                                                     | 72          |           |
| CoN/NF                                   | 1 M KOH              | 10                                    | 290                                                     | 70          | Ref. S2   |
| 3DG/CoAl-NSs                             | 1 M KOH              | 10                                    | 252                                                     | 64          | Ref. S3   |
| Co-B <sub>1</sub> NS/G                   | 1 M KOH              | 10                                    | 290                                                     | 53          | Ref. S4   |
| PE-Co <sub>3</sub> O <sub>4</sub> NS/Ti  | 0.1 M KOH            | 10                                    | 300                                                     | 68          | Ref. S5   |
| CoFeNiO <sub>x</sub> /NF                 | 1 M KOH              | 10                                    | 240                                                     |             | Ref. S6   |
| NiCo <sub>2</sub> O <sub>4</sub>         | 1 M NaOH             | 10                                    | 290                                                     | 53          | Ref. S7   |
| NiCo <sub>2</sub> S <sub>4</sub> /NF     | 1 M KOH              | 10                                    | 260                                                     | 40.1        | Ref.S8    |
| NiCeO <sub>x</sub> -Au                   | 1 M NaOH             | 10                                    | 271                                                     |             | Ref.S9    |
| CP/CTs/Co-S                              | 1 M KOH              | 10                                    | 306                                                     | 72          | Ref.S10   |

Table S3. Comparison of HER activity of the NSP-Co<sub>3</sub>FeN<sub>x</sub>/NF with recently reported catalyst.

| Electrocatalyst                          | Electrolyte solution | Current density (mA/cm <sup>2</sup> ) | Overpotential at the corresponding Current density (mV) | Tafel slope | Reference |
|------------------------------------------|----------------------|---------------------------------------|---------------------------------------------------------|-------------|-----------|
| NSP-Co <sub>3</sub> FeN <sub>x</sub> /NF | 1 M KOH              | 10                                    | 23                                                      | 94          | This work |
|                                          |                      | 20                                    | 83                                                      |             |           |
|                                          |                      | 50                                    | 119                                                     |             |           |
| NiCo <sub>2</sub> S <sub>4</sub> /NF     | 1 M KOH              | 10                                    | 210                                                     | 59          | Ref. S8   |
| CP/CTs/Co-S                              | 1 M KOH              | 10                                    | 190                                                     | 131         | Ref. S10  |
| CoSe/NiFe-LDHs/EG                        | 1 M KOH              | 10                                    | 260                                                     |             | Ref. S11  |
| C-CoSe <sub>2</sub> /CC                  | 1 M KOH              | 10                                    | 190                                                     | 85          | Ref. S12  |
| Ni <sub>3</sub> S <sub>2</sub> /NF       | 1 M KOH              | 10                                    | 223                                                     | -           | Ref. S13  |
| NiSe/NF                                  | 1 M KOH              | 10                                    | 96                                                      | 43          | Ref. S14  |
| CoP/CC                                   | 1 M KOH              | 10                                    | 210                                                     | 51          | Ref.S15   |

Table S4. Comparison of the bifunctional water splitting activity of the NSP-Co<sub>3</sub>FeN<sub>x</sub>/NF with recently reported bifunctional catalysts in basic solutions.

| Electrocatalyst                          | Mass loading (mg/cm <sup>2</sup> ) | Electrolyte solution | Current density (mA/cm <sup>2</sup> ) | Water splitting voltage (V) | Reference |
|------------------------------------------|------------------------------------|----------------------|---------------------------------------|-----------------------------|-----------|
| NSP-Co <sub>3</sub> FeN <sub>x</sub> /NF | 0.8                                | 1 M KOH              | 10                                    | 1.539                       | This work |
|                                          |                                    |                      | 20                                    | 1.575                       |           |
|                                          |                                    |                      | 50                                    | 1.628                       |           |
| NiCo <sub>2</sub> O <sub>4</sub>         |                                    | 1 M KOH              | 10                                    | 1.65                        | Ref. S7   |
| NiCo <sub>2</sub> S <sub>4</sub> /NF     |                                    | 1 M KOH              | 10                                    | 1.63                        | Ref. S8   |
| CP/CTs/Co-S                              |                                    | 1 M KOH              | 10                                    | 1.74                        | Ref. S10  |
| CoSe/NiFe-LDHs/EG                        |                                    | 1 M KOH              | 10                                    | 1.67                        | Ref. S11  |
| Ni <sub>3</sub> S <sub>2</sub> /NF       | 1.6                                | 1 M KOH              | 13                                    | 1.76                        | Ref. S13  |
| NiSe/NF                                  |                                    | 1 M KOH              | 10                                    | 1.63                        | Ref. S14  |

## REFERENCE

1. P. Chen, K. Xu, Z. Fang, Y. Tong, J. Wu, X. Lu, X. Peng, H. Ding, C. Wu and Y. Xie, *Angew. Chem.*, 2015, **127**, 14923-14927.
2. Y. Zhang, B. Ouyang, J. Xu, G. Jia, S. Chen, R. S. Rawat and H. J. Fan, *Angew. Chem. Int. Ed.*, 2016, **55**, 8670-8674.
3. J. Ping, Y. Wang, Q. Lu, B. Chen, J. Chen, Y. Huang, Q. Ma, C. Tan, J. Yang, X. Cao, Z. Wang, J. Wu, Y. Ying and H. Zhang, *Adv. Mater.*, 2016. DOI:10.1002/adma.201601019
4. P. Chen, K. Xu, T. Zhou, Y. Tong, J. Wu, H. Cheng, X. Lu, H. Ding, C. Wu and Y. Xie, *Angew. Chem. Int. Ed.*, 2016, **55**, 2488-2492.
5. L. Xu, Q. Jiang, Z. Xiao, X. Li, J. Huo, S. Wang and L. Dai, *Angew. Chem.*, 2016, **128**, 5363-5367.
6. C. G. Morales-Guio, L. Liardet and X. Hu, *J. Am. Chem. Soc.*, 2016, **138**, 8946-8957.
7. X. Gao, H. Zhang, Q. Li, X. Yu, Z. Hong, X. Zhang, C. Liang and Z. Lin, *Angew. Chem. Int. Ed.*, 2016, **55**, 6290-6294.
8. A. Sivanantham, P. Ganesan and S. Shanmugam, *Adv. Funct. Mater.*, 2016, **26**, 4660-4660.
9. J. W. D. Ng, M. Garcia-Melchor, M. Bajdich, P. Chakthranont, C. Kirk, A. Vojvodic and T. F. Jaramillo, *Nature Energy*, 2016, **1**, 16053. DOI: 10.1038/nenergy.2016.53
10. J. Wang, H.-x. Zhong, Z.-l. Wang, F.-l. Meng and X.-b. Zhang, *ACS Nano*, 2016, **10**, 2342-2348.
11. Y. Hou, M. R. Lohe, J. Zhang, S. Liu, X. Zhuang and X. Feng, *Energy & Environmental Science*, 2016, **9**, 478-483.
12. P. Chen, K. Xu, S. Tao, T. Zhou, Y. Tong, H. Ding, L. Zhang, W. Chu, C. Wu and Y. Xie, *Adv. Mater.*, 2016. DOI: 10.1002/adma.201601663
13. L.-L. Feng, G. Yu, Y. Wu, G.-D. Li, H. Li, Y. Sun, T. Asefa, W. Chen and X. Zou, *J. Am. Chem. Soc.*, 2015, **137**, 14023-14026.
14. C. Tang, N. Cheng, Z. Pu, W. Xing and X. Sun, *Angew. Chem. Int. Ed.*, 2015, **54**, 9351-9355.
15. J. Tian, Q. Liu, A. M. Asiri and X. Sun, *J. Am. Chem. Soc.*, 2014, **136**, 7587-7590.
